# Supplementary material for: Astaxanthin-Loaded Pickering Emulsions Stabilized by Nanofibrillated Cellulose: Impact on Emulsion Characteristics, Digestion Behavior, and Bioaccessibility
Source: MDPI journal article supplement (doi:10.3390/polym15040901), 2023-02-11
Supplement: s1 [file s1]

## Supplementary Data

**Table S1.** Emulsion properties and stability of NFC-stabilized emulsions without astaxanthin which were measured for freshly prepared emulsions and those after stored at room temperature for one month

| NFC<br>concentration<br>(%) | $d_{32}$<br>( $\mu\text{m}$ ) |                     | $\zeta$ -potential<br>(mV) |                      | $\eta_{a,100}$<br>(mPa.s) |                     |
|-----------------------------|-------------------------------|---------------------|----------------------------|----------------------|---------------------------|---------------------|
|                             | Day 1                         | Day 30              | Day 1                      | Day 30               | Day 1                     | Day 30              |
| 0.3                         | 7.37 $\pm$ 0.21a,C            | 7.79 $\pm$ 0.07a,C  | -38.02 $\pm$ 5.89a,A       | -35.5 $\pm$ 1.40a,A  | 36 $\pm$ 0.0008a,B        | 39 $\pm$ 0.0011a,B  |
| 0.5                         | 10.43 $\pm$ 0.31a,B           | 11.12 $\pm$ 0.36a,B | -30.47 $\pm$ 6.67a,B       | -27.93 $\pm$ 1.59b,B | 78 $\pm$ 0.0022a,A        | 95 $\pm$ 0.0016a,A  |
| 0.7                         | 13.33 $\pm$ 0.09a,A           | 14.21 $\pm$ 0.28a,A | -25.62 $\pm$ 3.64a,C       | -23.00 $\pm$ 2.36a,C | 84 $\pm$ 0.0048a,A        | 104 $\pm$ 0.0089a,A |

Values were measured in triplicate and shown as mean  $\pm$  standard deviation.

Different lowercase letters (a–b) in the same row resulted in a significant ( $p \leq 0.05$ ) difference with respect to storage time. Different uppercase letters (A–C) in the same column resulted in a significant ( $p \leq 0.05$ ) difference with respect to NFC concentration.

**Table S2.** Color ( $L^*$ ,  $a^*$ ,  $b^*$ ) of NFC-stabilized emulsions without astaxanthin measured after 1 day and 30 days storage at room temperature for freshly prepared emulsions and those after stored at room temperature for one month

| NFC<br>concentration (%) | Color               |                     |                     |                      |                    |                    |                                 |                    |
|--------------------------|---------------------|---------------------|---------------------|----------------------|--------------------|--------------------|---------------------------------|--------------------|
|                          | $L^*$ (lightness)   |                     | $a^*$ (redness)     |                      | $b^*$ (yellowness) |                    | $\Delta E$ (Total color change) |                    |
|                          | Day 1               | Day 30              | Day 1               | Day 30               | Day 1              | Day 30             | Day 1                           | Day 30             |
| 0.3                      | 76.23 $\pm$ 0.06a,A | 74.87 $\pm$ 0.06b,A | 0.17 $\pm$ 0.06a,A  | -0.17 $\pm$ 0.06b,A  | 1.7 $\pm$ 0.10a,A  | 1.43 $\pm$ 0.06a,A | –                               | 1.43 $\pm$ 0.04a,A |
| 0.5                      | 74.37 $\pm$ 0.06a,B | 73.2 $\pm$ 0.10a,B  | 0.01 $\pm$ 0.00a,B  | -0.27 $\pm$ 0.06b,AB | 1.47 $\pm$ 0.06a,B | 1.23 $\pm$ 0.06a,B | –                               | 1.38 $\pm$ 0.05a,A |
| 0.7                      | 73.4 $\pm$ 0.10a,C  | 71.7 $\pm$ 0.60a,C  | -0.23 $\pm$ 0.06a,C | -0.47 $\pm$ 0.06b,B  | 1.23 $\pm$ 0.06a,C | 0.80 $\pm$ 0.10a,C | –                               | 1.23 $\pm$ 0.06a,B |

Values were measured in triplicate and shown as mean  $\pm$  standard deviation.

Different lowercase letters (a–b) in the same row resulted in a significant ( $p \leq 0.05$ ) difference with respect to storage time. Different uppercase letters (A–C) in the same column resulted in a significant ( $p \leq 0.05$ ) difference with respect to NFC concentration.
